# Supplementary material for: Modes-of-Action Related to Repeated Dose Toxicity: Tissue-Specific Biological Roles of PPARγ Ligand-Dependent Dysregulation in Nonalcoholic Fatty Liver Disease
Source: PubMed Central journal article supplement (PMC3977565; doi:10.1155/2014/432647), 2014-03-18
Supplement: 432647.f1.pdf [file 432647.f1.pdf]

|       |   |   |    |    |   |   |   |   |    |    |   |   |   |    |
|-------|---|---|----|----|---|---|---|---|----|----|---|---|---|----|
| 57    |   |   | ✓  | ✓  |   |   |   |   | ✓  | ✓  |   |   |   |    |
| 58    |   |   | ✓  | ✓  |   |   |   |   | ✓  | ✓  |   |   |   |    |
| 59    |   |   |    |    |   |   |   |   |    |    |   |   |   | ✓  |
| 60    |   |   | ✓  | ✓  |   |   |   |   | ✓  | ✓  |   |   |   |    |
| 61    |   |   | ✓  | ✓  |   |   |   |   | ✓  | ✓  |   |   |   |    |
| 62    |   |   |    | ✓  |   |   |   |   | ✓  |    |   |   |   |    |
| 63    |   |   | ✓  | ✓  |   |   |   |   | ✓  | ✓  | ✓ |   |   |    |
| 64    |   |   | ✓  |    |   |   |   |   | ✓  |    |   |   |   |    |
| 65    |   |   | ✓  |    |   |   |   |   | ✓  | ✓  |   |   |   |    |
| 66    |   |   |    |    |   |   |   |   |    |    |   |   |   | ✓  |
| 67    |   |   |    |    |   |   |   |   |    |    |   |   |   | ✓  |
| 68    |   |   |    |    |   |   |   |   |    |    |   |   |   | ✓  |
| 69    |   |   |    |    |   |   |   |   |    |    |   |   |   | ✓  |
| 70    |   |   |    |    |   |   |   |   |    |    |   |   |   | ✓  |
| 71    |   |   |    |    |   |   |   |   |    |    |   |   |   | ✓  |
| 72    |   |   |    |    |   |   |   |   |    |    |   |   | ✓ |    |
| Total | 3 | 5 | 25 | 15 | 4 | 1 | 5 | 2 | 14 | 17 | 9 | 4 | 7 | 32 |
